# Supplementary material for: A new boat-like tungstoarsenate functionalized by carboxyethyltin and its catalytic properties
Source: Royal Society of Chemistry journal article supplement (doi:10.1039/c5ra27781g), 2016-01-01
Supplement: c5ra27781g1.pdf [file c5ra27781g1.pdf]

## Supporting Information

# A new boat-like tungstoarsenate functionalized by carboxyethyltin and its catalytic properties

Li-Ping Ji,<sup>a</sup> Jing Du,<sup>a</sup> Jian-Sheng Li,<sup>a</sup> Lan-Cui Zhang,<sup>\*,a</sup> Xiao-Jing Sang,<sup>\*,a,b</sup> He Yang<sup>a</sup>, Hong-Juan Cui,<sup>a</sup> Zai-Ming Zhu<sup>\*,a</sup>

1. Experimental section
2. Crystal structure
3. Physical characterizations
4. Catalytic tests

## 1. Experimental section

### Materials and instrumentation

All reagents and chemicals were purchased from commercial sources and used without further purification.  $K_{14}[As_2W_{19}O_{67}(H_2O)] \cdot nH_2O$  [S1] ( $\{As_2W_{19}\}$ ) and the organotin precursor  $Cl_3SnCH_2CH_2COOCH_3$  [S2] were synthesized according to the published procedures. All of them were characterized by IR spectroscopy. C, H and N elemental analyses were performed on a Vario Elcube elemental analyzer, and Na, K, As, Sn and W were analyzed on a Prodigy XP emission spectrometer. The IR spectra was recorded using KBr pellets on a Bruker AXSTENSOR-27 FTIR spectrometer in the range of 4000-400  $cm^{-1}$ . TG analysis was performed on a Pyris Diamond TG-DTA thermal analyzer at a heating rate of 10  $^{\circ}C\ min^{-1}$  in an air atmosphere. Single crystal X-ray diffraction data was collected on a Bruker Smart APEX II X-diffractometer equipped with graphite-monochromated  $Mo\ K\alpha$  radiation ( $\lambda = 0.71073\ \text{\AA}$ ). X-ray powder diffraction (XRPD) data was collected on a Bruker AXS D8 Advance diffractometer using  $Cu\ K\alpha$  radiation ( $\lambda = 1.5418\ \text{\AA}$ ) in the  $2\theta$  range of 5-50 $^{\circ}$  with a step size of 0.02 $^{\circ}$ . UV-visible spectra was recorded on a Lambda 35 UV-vis spectrophotometer. A CHI 604B electrochemical workstation was used to control the electrochemical measurements and collect data. A conventional three electrode system was used. The working electrode was a glassy carbon electrode.  $Ag/AgCl$  was used as a reference electrode, and platinum wire was used as a counter electrode. The yield of cyclohexanone was confirmed on a JK-GC112A Gas Chromatograph. The CEL-HXF300 300W Xe lamp ( $\lambda = 420-780\ \text{nm}$ ) was used to irradiate the light source of photocatalysis.

### Synthesis of 1

$Cl_3SnCH_2CH_2COOCH_3$  (0.1 g, 0.32 mmol) and  $\{As_2W_{19}\}$  (0.5 g) were dissolved in 30 mL of a pH 6.0 NaAc-HAc buffer solution with vigorous stirring, and the mixture was stirred for 5 h at 90  $^{\circ}C$ . After cooling to ambient temperature, the insoluble material was filtered off and the clear filtrate was treated with 2.0 g KCl, and 1.5 mL of a 1 mol  $L^{-1}$  aqueous  $C(NH_2)_3Cl$  solution. Slow evaporation at 50  $^{\circ}C$  led to the appearance of colorless crystalline compound **1** after about 20 days (Yield: ca. 54% based on W). Elemental analysis, Found: C 2.13, H 1.01, N 0.57, Na 3.16, K 3.74, As 2.05, Sn 6.54, W 55.52. Calc. for  $C_{13}H_{73}As_2K_7Na_{10}N_3O_{115}Sn_4W_{22}$ : C 2.14, H 1.00, N 0.58, Na 3.16, K 3.76, As 2.06, Sn 6.52, W 55.53. IR (KBr,  $cm^{-1}$ ): 3444(s), 3143(s), 2923(w), 2862(w), 1628(s), 1400(s), 1118(w), 945(s), 883(s), 787 (s), 694(s), 474(w).

### **Oxidation of cyclohexanol to cyclohexanone**

The typical procedure for the oxidation catalytic synthesis is: the catalyst (**1**) was added to a mixture of cyclohexanol and acetonitrile in a 100 mL three-necked round-bottom flask equipped with a reflux condenser, and 30% H<sub>2</sub>O<sub>2</sub> was dropwise added to the mixture under refluxing conditions (*ca.* 80 °C) over 3.5 h. After completing the reaction, the solvent acetonitrile was removed by distillation, and thus the organic and inorganic phases could be separated by separatory funnel extraction method, and the catalyst was remained in the reaction vessel. Additionally, the reusability of compound **1** was studied through four runs under optimum reaction conditions. The products obtained were characterized by gas chromatography.

### **Photocatalytic experiments**

The photocatalytic reaction was carried out in a 250 mL reactor attached to an inner radiation type with a 300 Whigh-pressure Xe lamp, using the light filter of 420-780 nm as light source. Circulating water was kept flowing through a jacket between the Xe lamp and the reaction chamber, and the system was open to the air. The photocatalytic activities of the samples wereevaluated by measuring the degradation efficiency of RhB solution after a regular interval Xe light irradiation.Preparation of the catalyst was as follows: 0.006 mmol compound was dissolved in 30.0 mL water and the pH value was adjusted to 3.0, followed by adding a certain amount of tetrabutylammonium bromide (TBA) to balance charges in POMs. In the process of photocatalysis, firstly 5.0 mL the solution suspended in 0.02 mmol L<sup>-1</sup> RhB aqueous solution (50.0 mL) (RhB to catalyst molar ratio 1:1). Take half the volume of the solution after once degradation (RhB to catalyst molar ratio 1:1).The solution was diluted to the initial volume, while adding RhB to maintain the same concentration. In accordance with this method, the solution was diluted to RhB to catalyst molar ratio 1:16.In the process, when the dye is completely degraded, the dye wasre-added to the system, and the catalyst was used for recycling.The solution was magnetically stirred to ensure the equilibrium in the dark for 30 min. Then, every 30 min, 2.0 mL sample was takenoutfor analysis by UV-vis spectroscopy.

## 2. Crystal structure

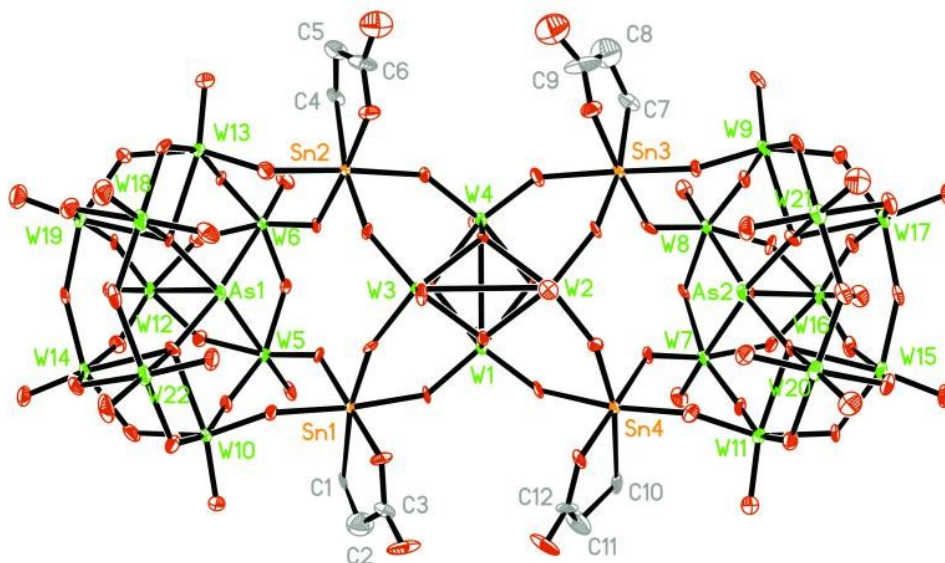

**Fig. S1** ORTEP drawing of the polyoxoanion of **1** with thermal ellipsoids at 30 % probability (H, K, Na atoms,  $[\text{C}(\text{NH}_2)_3]^+$  and free water molecules have been omitted for clarity)

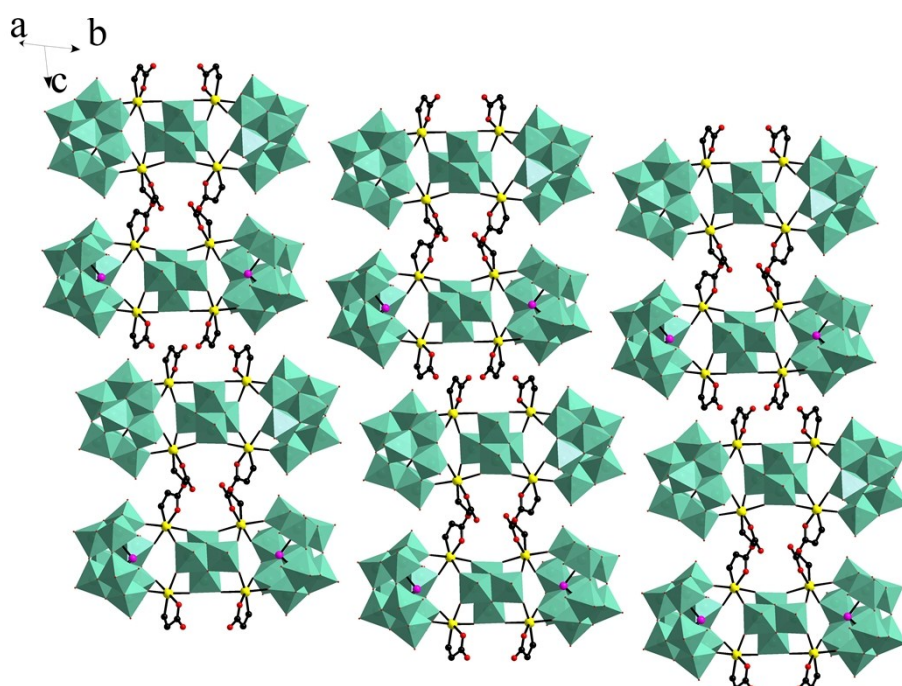

**Fig. S2** Polyhedral and ball-and-stick view of the 3D supramolecular framework of **1** (All H atoms, the isolated  $[\text{C}(\text{NH}_2)_3]^+$ ,  $\text{K}^+$ ,  $\text{Na}^+$  and water molecules existing in the interspaces are omitted for clarity)

**Table S1.** Crystal and refinement data for **1**

| Compound                                                           | <b>1</b>                                                                                                                                        |
|--------------------------------------------------------------------|-------------------------------------------------------------------------------------------------------------------------------------------------|
| Formula                                                            | C <sub>13</sub> H <sub>72</sub> As <sub>2</sub> K <sub>7</sub> Na <sub>10</sub> N <sub>3</sub> O <sub>115</sub> Sn <sub>4</sub> W <sub>22</sub> |
| Formula weight                                                     | 7283.64                                                                                                                                         |
| <i>T</i> /K                                                        | 296(2)                                                                                                                                          |
| Wavelength / Å                                                     | 0.71073                                                                                                                                         |
| Crystal system                                                     | Monoclinic                                                                                                                                      |
| Space group                                                        | <i>P</i> 1̄                                                                                                                                     |
| <i>a</i> , <i>b</i> , <i>c</i> /Å                                  | 11.9822(16), 22.500(3), 25.497(3)                                                                                                               |
| <i>α</i> , <i>β</i> , <i>γ</i> /°                                  | 69.912(2), 82.904(2), 86.609(2)                                                                                                                 |
| <i>V</i> /Å <sup>3</sup> , <i>Z</i>                                | 6405.2(15), 2                                                                                                                                   |
| <i>D<sub>c</sub></i> /g cm <sup>-3</sup> , <i>F</i> <sub>000</sub> | 3.777, 6456                                                                                                                                     |
| GOF                                                                | 1.002                                                                                                                                           |
| Reflections collected                                              | 32489                                                                                                                                           |
| <i>R</i> <sub>int</sub>                                            | 0.0554                                                                                                                                          |
| <i>θ</i> Range(°)                                                  | 1.05 to 25.00                                                                                                                                   |
| <i>R</i> <sub>1</sub> ( <i>I</i> > 2σ( <i>I</i> )) <sup>a</sup>    | 0.0561                                                                                                                                          |
| <i>wR</i> <sub>2</sub> (all data) <sup>a</sup>                     | 0.1566                                                                                                                                          |

$$^a R_1 = \sum ||F_o| - |F_c|| / \sum |F_o|; wR_2 = \sum [w(F_o^2 - F_c^2)^2] / \sum [w(F_o^2)^2]^{1/2}$$

**Table S2.** Selected bond lengths (Å) and angles (°) for **1**

| Bond   | Length (Å) | Bond    | Length (Å) | Bond    | Length (Å) |
|--------|------------|---------|------------|---------|------------|
| W1–O55 | 1.734(12)  | W11–O49 | 1.739(14)  | W21–O56 | 1.735(15)  |
| W1–O62 | 1.780(14)  | W11–O2  | 1.824(15)  | W21–O77 | 1.754(16)  |
| W1–O12 | 1.832(12)  | W11–O1  | 1.892(13)  | W21–O4  | 1.923(15)  |
| W1–O53 | 2.057(13)  | W11–O15 | 1.895(13)  | W21–O13 | 1.972(14)  |
| W1–O43 | 2.071(13)  | W11–O58 | 1.974(14)  | W21–O25 | 2.071(15)  |
| W1–O26 | 2.228(12)  | W11–O31 | 2.311(12)  | W21–O35 | 2.307(11)  |
| W2–O17 | 1.747(12)  | W12–O39 | 1.723(14)  | W22–O44 | 1.689(16)  |
| W2–O76 | 1.800(13)  | W12–O51 | 1.872(14)  | W22–O73 | 1.747(15)  |
| W2–O33 | 1.802(12)  | W12–O27 | 1.882(14)  | W22–O30 | 1.944(16)  |
| W2–O65 | 2.024(12)  | W12–O23 | 1.891(14)  | W22–O79 | 1.976(14)  |
| W2–O26 | 2.056(12)  | W12–O8  | 1.892(15)  | W22–O70 | 2.086(14)  |
| W2–O43 | 2.211(12)  | W12–O38 | 2.430(12)  | W22–O47 | 2.301(13)  |
| W3–O42 | 1.760(12)  | W13–O81 | 1.725(14)  | Sn1–O50 | 2.023(12)  |
| W3–O50 | 1.809(13)  | W13–O29 | 1.810(15)  | Sn1–O72 | 2.035(13)  |
| W3–O66 | 1.825(12)  | W13–O37 | 1.873(14)  | Sn1–O12 | 2.049(13)  |
| W3–O26 | 2.039(13)  | W13–O40 | 1.939(13)  | Sn1–O54 | 2.122(14)  |
| W3–O65 | 2.054(12)  | W13–O11 | 1.988(15)  | Sn1–O83 | 2.159(13)  |
| W3–O53 | 2.185(12)  | W13–O45 | 2.321(12)  | Sn2–O66 | 2.036(12)  |
| W4–O67 | 1.735(14)  | W14–O74 | 1.703(15)  | Sn2–O60 | 2.047(11)  |
| W4–O36 | 1.782(13)  | W14–O70 | 1.834(13)  | Sn2–O71 | 2.061(14)  |
| W4–O71 | 1.830(14)  | W14–O18 | 1.920(13)  | Sn2–O29 | 2.131(17)  |
| W4–O43 | 2.055(12)  | W14–O24 | 1.923(16)  | Sn2–O85 | 2.198(14)  |

|            |           |             |           |             |           |
|------------|-----------|-------------|-----------|-------------|-----------|
| W4-O53     | 2.080(13) | W14-O27     | 1.949(14) | Sn3-O33     | 2.051(13) |
| W4-O65     | 2.252(12) | W14-O47     | 2.411(14) | Sn3-O34     | 2.059(14) |
| W5-O68     | 1.698(13) | W15-O78     | 1.729(16) | Sn3-O20     | 2.072(13) |
| W5-O72     | 1.821(13) | W15-O19     | 1.825(13) | Sn3-O36     | 2.110(14) |
| W5-O41     | 1.881(13) | W15-O58     | 1.902(13) | Sn3-O87     | 2.207(15) |
| W5-O52     | 1.963(13) | W15-O16     | 1.917(13) | Sn4-O76     | 2.031(12) |
| W5-O23     | 1.972(14) | W15-O63     | 1.922(14) | Sn4-O7      | 2.037(13) |
| W5-O38     | 2.392(12) | W15-O31     | 2.433(13) | Sn4-O2      | 2.090(15) |
| W6-O80     | 1.735(14) | W16-O75     | 1.714(16) | Sn4-O62     | 2.109(14) |
| W6-O60     | 1.846(12) | W16-O28     | 1.882(13) | Sn4-O89     | 2.172(13) |
| W6-O40     | 1.892(13) | W16-O3      | 1.888(13) | Sn1-C1      | 2.098(17) |
| W6-O52     | 1.913(13) | W16-O5      | 1.891(13) | Sn2-C4      | 2.125(19) |
| W6-O8      | 1.979(16) | W16-O63     | 1.895(15) | Sn3-C7      | 2.14(2)   |
| W6-O38     | 2.307(12) | W16-O46     | 2.407(14) | Sn4-C10     | 2.15(2)   |
| W7-O32     | 1.714(13) | W17-O6      | 1.728(15) | As1-O38     | 1.770(12) |
| W7-O7      | 1.844(13) | W17-O25     | 1.848(14) | As1-O47     | 1.796(13) |
| W7-O57     | 1.921(13) | W17-O48     | 1.907(13) | As1-O45     | 1.803(12) |
| W7-O15     | 1.928(13) | W17-O16     | 1.910(14) | As2-O46     | 1.786(12) |
| W7-O28     | 2.013(15) | W17-O3      | 1.928(13) | As2-O31     | 1.783(13) |
| W7-O46     | 2.355(12) | W17-O35     | 2.381(14) | As2-O35     | 1.808(12) |
| W8-O59     | 1.717(13) | W18-O82     | 1.677(18) | C1-C2       | 1.513(10) |
| W8-O34     | 1.850(14) | W18-O22     | 1.709(15) | C2-C3       | 1.48(3)   |
| W8-O61     | 1.855(12) | W18-O30     | 1.881(15) | C4-C5       | 1.519(10) |
| W8-O57     | 1.934(12) | W18-O37     | 1.979(14) | C5-C6       | 1.525(10) |
| W8-O5      | 1.960(14) | W18-O9      | 2.105(16) | C7-C8       | 1.519(10) |
| W8-O46     | 2.331(13) | W18-O45     | 2.313(12) | C8-C9       | 1.50(4)   |
| W9-O14     | 1.702(13) | W19-O10     | 1.707(17) | C10-C11     | 1.52(3)   |
| W9-O20     | 1.817(13) | W19-O9      | 1.851(14) | C11-C12     | 1.50(3)   |
| W9-O13     | 1.873(13) | W19-O11     | 1.904(13) | C3-O83      | 1.27(2)   |
| W9-O48     | 1.952(14) | W19-O18     | 1.907(13) | C3-O84      | 1.23(3)   |
| W9-O61     | 1.983(12) | W19-O51     | 1.945(14) | C6-O85      | 1.24(2)   |
| W9-O35     | 2.347(13) | W19-O45     | 2.387(13) | C6-O86      | 1.21(3)   |
| W10-O69    | 1.730(14) | W20-O64     | 1.744(15) | C9-O87      | 1.25(3)   |
| W10-O54    | 1.783(14) | W20-O21     | 1.745(17) | C9-O88      | 1.26(4)   |
| W10-O79    | 1.887(14) | W20-O4      | 1.899(14) | C12-O89     | 1.29(2)   |
| W10-O41    | 1.958(13) | W20-O1      | 1.967(13) | C12-O90     | 1.21(3)   |
| W10-O24    | 1.963(16) | W20-O19     | 2.108(15) |             |           |
| W10-O47    | 2.309(14) | W20-O31     | 2.317(12) |             |           |
| Bond       | Angle(°)  | Bond        | Angle(°)  | Bond        | Angle(°)  |
| O12-W1-O43 | 159.1(5)  | O69-W10-O47 | 168.5(6)  | O9-W19-O45  | 74.3(6)   |
| O55-W1-O26 | 164.8(5)  | O79-W10-O47 | 74.1(5)   | O11-W19-O45 | 73.3(5)   |
| O53-W1-O26 | 73.6(5)   | O24-W10-O47 | 74.7(5)   | O64-W20-O19 | 164.7(6)  |
| O43-W1-O26 | 73.9(5)   | O2-W11-O58  | 160.3(6)  | O21-W20-O31 | 163.5(6)  |
| O76-W2-O65 | 158.6(5)  | O49-W11-O31 | 168.3(6)  | O1-W20-O31  | 72.3(5)   |
| O65-W2-O26 | 73.8(5)   | O1-W11-O31  | 73.7(5)   | O19-W20-O31 | 72.2(5)   |

|             |          |             |          |              |          |
|-------------|----------|-------------|----------|--------------|----------|
| O17-W2-O43  | 166.9(6) | O58-W11-O31 | 74.8(5)  | O4-W21-O13   | 155.2(6) |
| O65-W2-O43  | 74.3(5)  | O51-W12-O23 | 158.9(5) | O77-W21-O25  | 164.0(6) |
| O66-W3-O26  | 160.4(5) | O39-W12-O38 | 169.9(6) | O13-W21-O35  | 72.9(5)  |
| O65-W3-O53  | 75.1(5)  | O23-W12-O38 | 73.8(5)  | O25-W21-O35  | 71.6(5)  |
| O26-W3-O65  | 73.5(5)  | O8-W12-O38  | 72.4(5)  | O44-W22-O70  | 162.7(7) |
| O42-W3-O53  | 165.6(6) | O29-W13-O11 | 159.7(6) | O73-W22-O47  | 163.9(7) |
| O36-W4-O53  | 157.9(5) | O81-W13-O45 | 167.4(6) | O79-W22-O47  | 72.7(5)  |
| O67-W4-O65  | 164.9(6) | O37-W13-O45 | 75.2(5)  | O70-W22-O47  | 71.2(5)  |
| O43-W4-O65  | 72.8(5)  | O11-W13-O45 | 73.5(5)  | O72-Sn1-O12  | 93.0(5)  |
| O53-W4-O65  | 73.1(4)  | O70-W14-O27 | 158.1(6) | O72-Sn1-C1   | 104.0(6) |
| O72-W5-O23  | 163.0(5) | O74-W14-O47 | 170.6(6) | O72-Sn1-O54  | 87.4(5)  |
| O68-W5-O38  | 167.6(6) | O70-W14-O47 | 72.7(5)  | C1-Sn1-O54   | 93.9(7)  |
| O52-W5-O38  | 71.7(5)  | O24-W14-O47 | 72.9(5)  | O66-Sn2-O71  | 84.4(5)  |
| O23-W5-O38  | 73.4(5)  | O19-W15-O63 | 158.2(6) | O60-Sn2-O29  | 87.2(5)  |
| O60-W6-O8   | 163.0(6) | O78-W15-O31 | 172.2(6) | C4-Sn2-O85   | 81.5(6)  |
| O80-W6-O38  | 168.1(6) | O19-W15-O31 | 74.2(5)  | C4-Sn2-O29   | 97.1(7)  |
| O52-W6-O38  | 74.5(5)  | O58-W15-O31 | 73.1(5)  | O33-Sn3-O20  | 87.7(5)  |
| O8-W6-O38   | 73.9(5)  | O28-W16-O3  | 159.3(6) | O33-Sn3-O36  | 82.0(5)  |
| O7-W7-O28   | 162.4(5) | O75-W16-O46 | 170.0(6) | O20-Sn3-C7   | 96.8(8)  |
| O32-W7-O46  | 168.6(6) | O28-W16-O46 | 74.4(5)  | C7-Sn3-O87   | 82.0(7)  |
| O57-W7-O46  | 72.7(5)  | O5-W16-O46  | 72.1(5)  | O7-Sn4-O2    | 88.2(5)  |
| O28-W7-O46  | 73.7(5)  | O25-W17-O3  | 158.6(6) | O76-Sn4-O62  | 83.1(5)  |
| O34-W8-O5   | 162.6(6) | O6-W17-O35  | 170.3(6) | O2-Sn4-C10   | 97.2(7)  |
| O59-W8-O46  | 165.0(6) | O25-W17-O35 | 73.6(5)  | C10-Sn4-O89  | 80.3(7)  |
| O57-W8-O46  | 73.0(5)  | O48-W17-O35 | 73.0(5)  | O38-As1-O47  | 98.5(6)  |
| O5-W8-O46   | 72.8(5)  | O82-W18-O9  | 164.9(6) | O38-As1-O45  | 96.9(6)  |
| O20-W9-O48  | 158.9(6) | O22-W18-O45 | 164.2(7) | O47-As1-O45  | 95.2(6)  |
| O14-W9-O35  | 167.6(6) | O37-W18-O45 | 73.6(5)  | O31-As2-O461 | 97.4(6)  |
| O13-W9-O35  | 73.6(5)  | O9-W18-O45  | 71.7(5)  | O46-As2-O35  | 96.9(6)  |
| O48-W9-O35  | 73.1(5)  | O9-W19-O51  | 159.2(6) | O31-As2-O35  | 96.0(6)  |
| O54-W10-O24 | 159.7(6) | O10-W19-O45 | 171.8(6) |              |          |

---

### 3. Physical characterizations

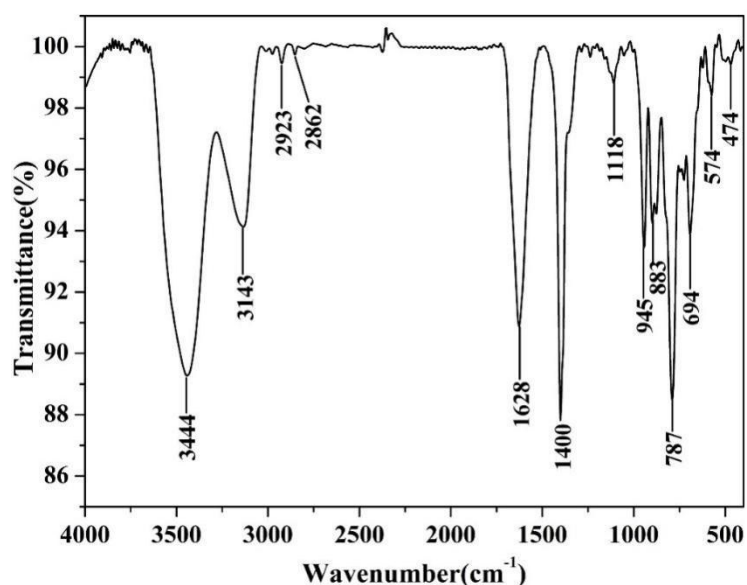

Fig. S3 The IR spectrum of **1**

IR spectrum of **1** further confirmed the successful introduction of carboxyethyltin group. As shown in Fig. S3, the peaks at 2923, 2862  $\text{cm}^{-1}$  for **1** can be attributed to the characteristic vibrations of the organic group ( $-\text{CH}_2$ ), while the sharp peaks at 1400 and 1628  $\text{cm}^{-1}$  for **1** are attributed to the stretching vibration of  $-\text{COO}$ .<sup>[S3]</sup> The appearance of the peaks at 474 and 574  $\text{cm}^{-1}$  for **1** can be regarded as symmetric vibration of Sn-C bond. Moreover, the peaks between 1030 and 760  $\text{cm}^{-1}$  are assigned to the characteristic vibrations of POMs, the peaks at 945, 883, 787, 694  $\text{cm}^{-1}$  for **1** are attributed to the asymmetric stretching vibrations of  $\text{W}-\text{O}_t$  and  $\text{W}-\text{O}_{b,c}$  ( $\text{O}_t$  and  $\text{O}_b / \text{O}_c$  represent terminal and bridging O atoms). The As-O stretching peak is located at about 1118  $\text{cm}^{-1}$ .

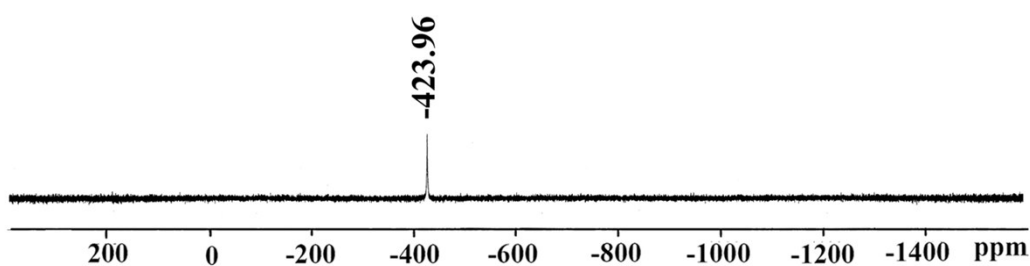

Fig. S4 The  $^{119}\text{Sn}$  NMR of  $\text{Cl}_3\text{Sn}(\text{CH}_2)_2\text{COOCH}_3$  in  $\text{D}_2\text{O}/(\text{CH}_3)_4\text{Sn}$



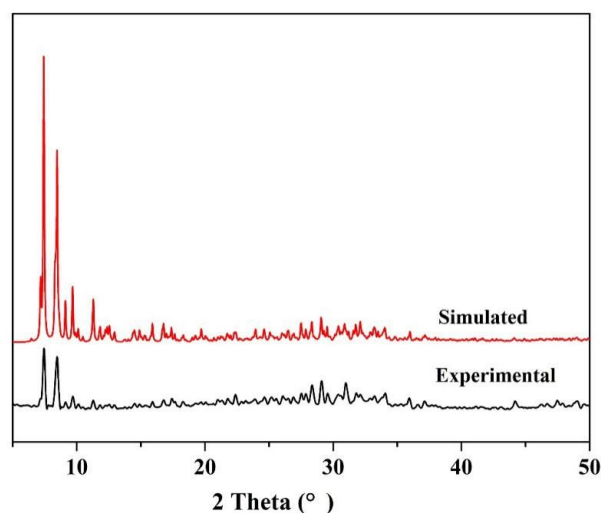

**Fig. S5** The simulated and experimental XRD patterns of **1**

The purity of the as-synthesized compound was evaluated by XRPD patterns for experimental and simulated results of **1** in Fig. S5, which illustrated the diffraction peaks of two patterns match well, indicating its good phase purity. The difference of intensity is probably due to the variation in preferred orientation of the powder sample during collection of the experimental XRPD pattern.

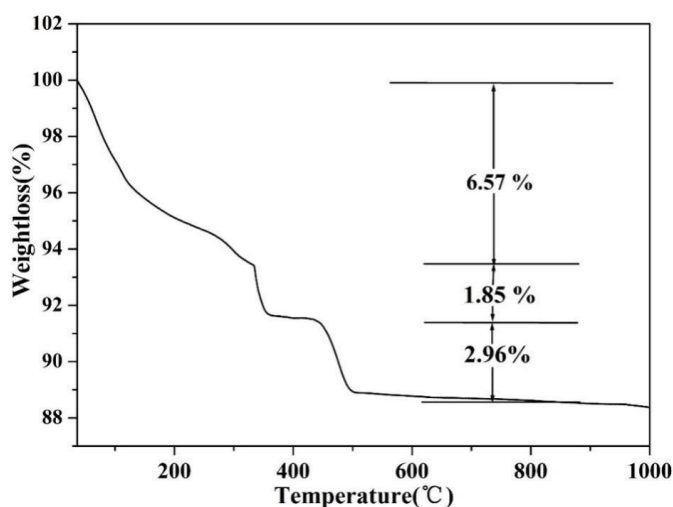

**Fig. S6** TG curve of **1**

This carboxyethyltin-POM hybrid shows good thermal stability. From the TG analysis (Fig. S6) we can see that the introduced  $(\text{CH}_2)_2\text{COO}^-$  group can be stable until 333 °C, in which there are three continuous weight loss steps from 35 to 800 °C for the title compound. The first weight loss of 6.57% (calcd. 6.20%) occurring from 35 to 333 °C corresponds to the loss of all lattice water molecules. The second weight loss of 1.85% (calcd. 1.82%) in the temperature range of 333-442 °C is attributed to the removal of one  $[\text{C}(\text{NH}_2)_3]^+$  organic cation and one  $(\text{CH}_2)_2\text{COO}^-$  group. Further, the compound continuously lost weight of 2.96% (calcd. 2.97%) at higher temperatures of 442-800 °C, which is mainly attributed to the loss of three  $(\text{CH}_2)_2\text{COO}^-$  groups. Within the temperature range of 800-1000 °C, the weight remains almost the same, inferring the polyoxoanion skeleton of **1** is stable.

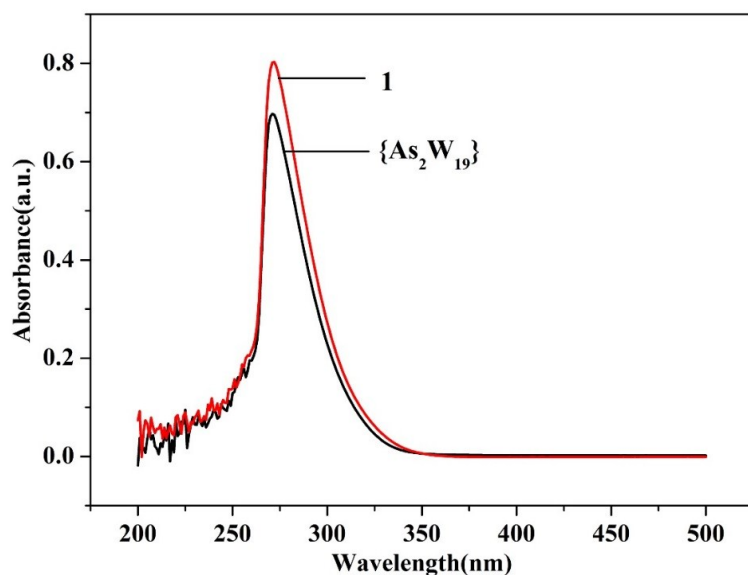

**Fig. S7** The UV-vis absorption spectrum of **1** and its parent  $\{\text{As}_2\text{W}_{19}\}$

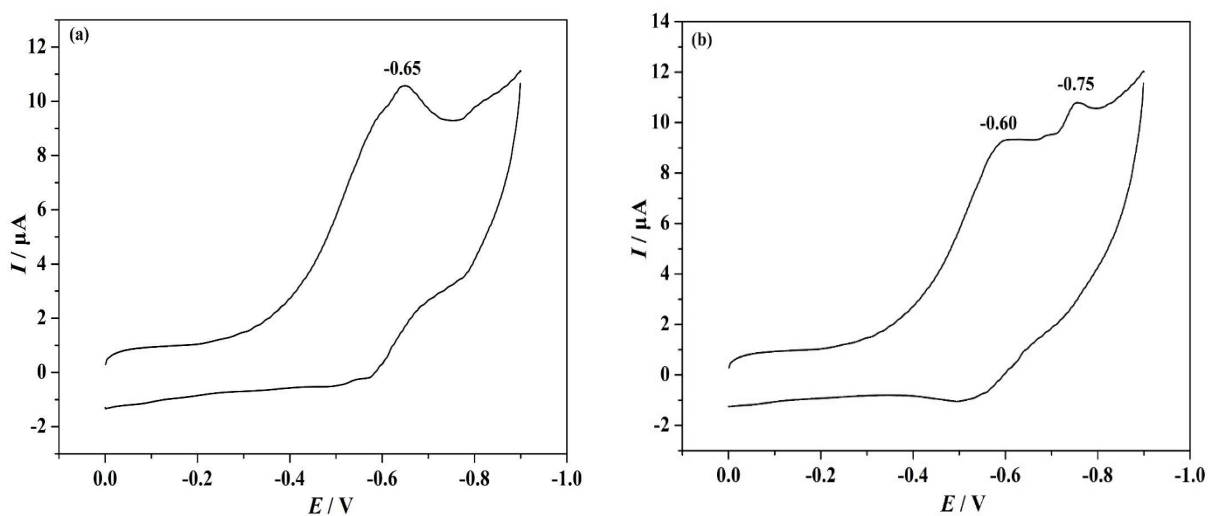

**Fig. S8** Cyclic voltammetry curves of  $\{\text{As}_2\text{W}_{19}\}$  (a) and **1** (b) in pH 3.0  $\text{Na}_2\text{SO}_4\text{-H}_2\text{SO}_4$  buffer solution

The redox property of **1** was evaluated by cyclic voltammetry in  $\text{Na}_2\text{SO}_4\text{-H}_2\text{SO}_4$  solution with pH = 3. As shown in Fig. S8, two cathode peaks were observed in the range from 0 to -1.0 V for **1**, indicating stepwise reduction processes, whereas only one cathode peak appeared for  $\{\text{As}_2\text{W}_{19}\}$ . Furthermore, their redox processes are irreversible.

## 4. Catalytic tests

### (1) The catalytic oxidation of cyclohexanol to cyclohexanone

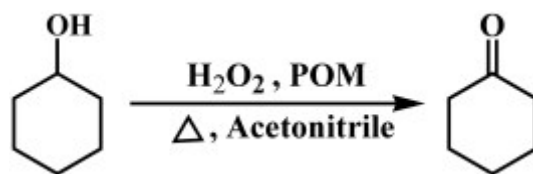

**Scheme S1** The oxidation process of cyclohexanone to cyclohexanol catalyzed by POMs

### (2) The mimic enzyme catalysis

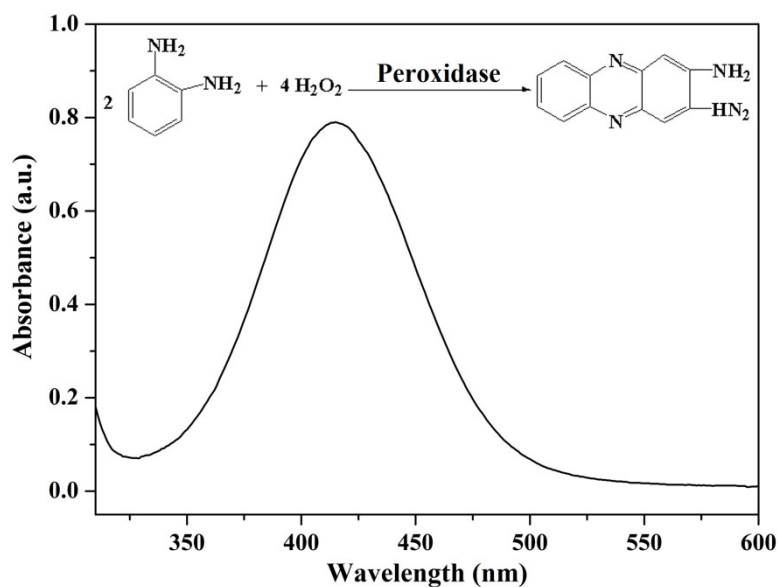

**Fig.S9** The UV-vis absorption spectrum of the resulted reaction solution of OPD catalyzed by **1**

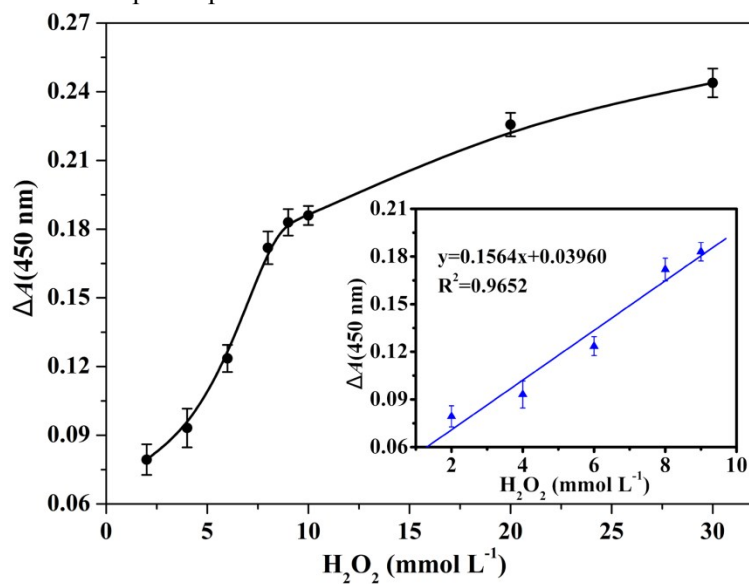

**Fig. S10** The linear calibration plot for H<sub>2</sub>O<sub>2</sub> detection,  $\Delta A = A(1, 450\text{nm}) - A(\text{blank}, 450\text{nm})$ , the error bars represent the standard deviation of three measurements

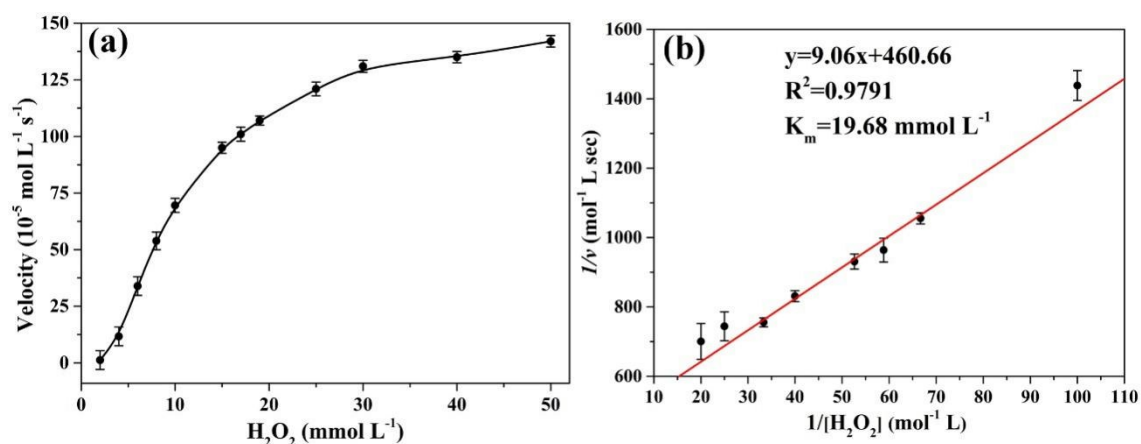

**Fig. S11** The kinetic analysis (a) and Lineweaver-Burk plots (b) of compound **1** with  $\text{H}_2\text{O}_2$  as substrate

The steady state kinetics was performed by varying the concentration of  $\text{H}_2\text{O}_2$  ( $2\text{--}50\text{ mmol L}^{-1}$ ) at fixed concentration of compound **1** ( $3\text{ mg}$ ) and OPD ( $2.5\text{ mmol L}^{-1}$ ). The reaction was conducted in  $1\text{ mL}$  acetate buffer ( $\text{pH} = 4.0$ ) and the variation of absorbance was monitored as function of time in  $2\text{ min}$  at  $450\text{ nm}$  ( $\epsilon = 1.26 \times 10^5\text{ mol L}^{-1}\text{ cm}^{-1}$ ). The apparent kinetic parameters were calculated based on the Lineweaver-Burk equation,  $1/V = K_m/V_{max} \times [S] + 1/V_{max}$ ,  $V$  is the velocity,  $V_{max}$  is the maximum velocity,  $K_m$  is the Menten constant,  $[S]$  is the concentration of  $\text{H}_2\text{O}_2$ .<sup>S4</sup>

### (3) The visible photocatalytic degradation of organic dye RhB

**Table.S3** Effect of catalyst dosage of compound **1** on photocatalytic degradation efficiency with  $50\text{ mL } 0.02\text{ mmol L}^{-1}$  RhB solution

| Entry | $n(\text{catalyst/RhB})$ | Time(h) | Degradation rate (%) | Degradation rate (%) |            |
|-------|--------------------------|---------|----------------------|----------------------|------------|
|       |                          |         |                      | Recycle I            | Recycle II |
| 1     | 1:1                      | 1.5     | 95                   | 99                   | 98         |
| 2     | 1:2                      | 2       | 97                   | 98                   | 98         |
| 3     | 1:4                      | 3       | 98                   | 97                   | 96         |
| 4     | 1:8                      | 4       | 94                   | 97                   | 97         |
| 5     | 1:16                     | 6       | 95                   | 95                   | 96         |

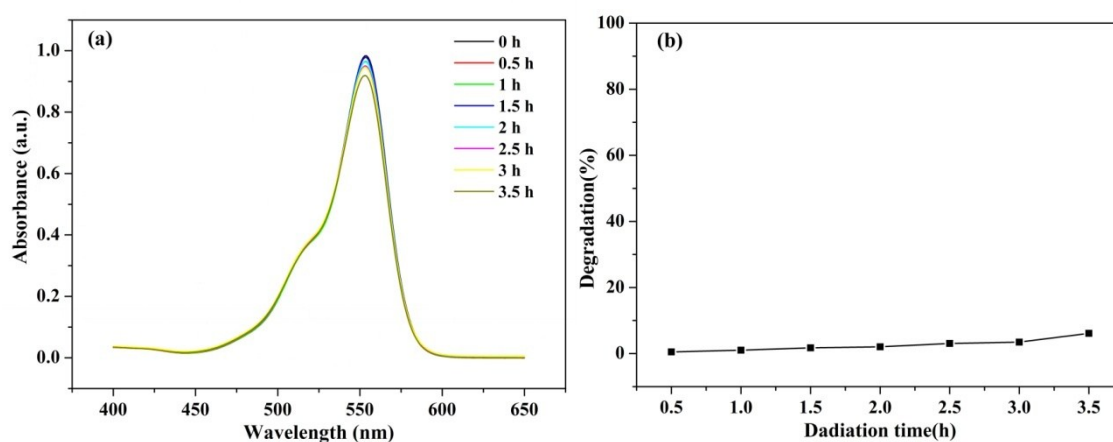

**Fig. S12** Photocatalytic degradation of RhB without **1** (a) and plot of degradation of RhB versus irradiation time under visible light without **1** (b)

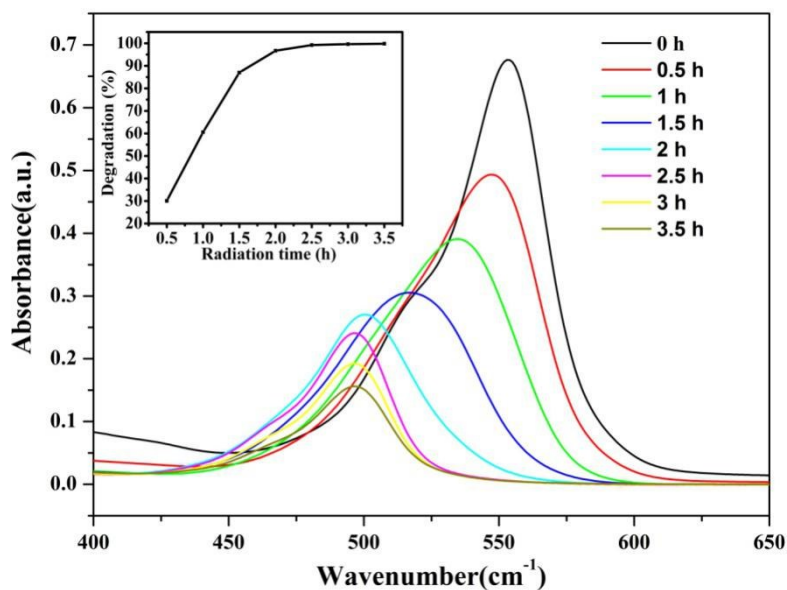

**Fig. S13** UV-vis absorption spectra of RhB solution during the decomposition process under visible light in the presence of the parent {As<sub>2</sub>W<sub>19</sub>}. The inset is the corresponding degradation versus reaction time

## References

- [S1] U. Körtz, M. G. Savelieff, B. S. Bassil and M. K. Dickman, *Angew. Chem. Int. Ed.* 2001, **40**, 3384-3386.
- [S2] R. E. Hutton, J. W. Burley and V. Oakes, *Organomet. Chem.* 1978, **156**, 369-382.
- [S3] (a) M. K. Rauf, M. A. Saeed, Imtiaz-ud-Din, M. Bolte, A. Badshah, B. J. Mirza, *Organomet. Chem.* 2008, **693**, 3043-3048; (b) J. W. Zhao, J. Zhang, Y. Song, S. T. Zheng and G. Y. Yang, *Eur. J. Inorg. Chem.* 2008, **2008**, 3809-3819.
- [S4] J. A. Nicell and H. Wright, *Enzyme Microb. Tech.*, 1997, **21**, 302-310.
